# Supplementary material
Source: publisher figshare collection journal article supplement (https://karger.figshare.com/ndownloader/files/25209443)
Supplement: Supplementary file 1 [file 25209443]

**Supplementary Table 2. Unrounded intercept and coefficients for full and simplified models**

| **Intercept and Predictors** | **Full Model β*** | **Simplified Model β*** |
| --- | --- | --- |
| Intercept | -3.1805094971 | -3.2551923022 |
| Female sex | 0.7477557746 | 0.7746252765 |
| African American race | 0.2724177128 | 0.2501421503 |
| Other race | -0.0361988945 | -0.0432566043 |
| Age | 0.0655747693 | 0.0660629418 |
| Age2 | -0.0007321214 | -0.0007422182 |
| Body mass index | 0.0480053891 | 0.0509713867 |
| PCOS | 0.7226136921 | NA |
| Type II diabetes mellitus | -0.4348706314 | -0.4231534235 |
| Acne | 1.2054775971 | 1.2406847667 |
| Depression | 0.1244549844 | NA |
| Substance use disorder (SUD) | -0.6080105168 | -0.5899496752 |
| OSA | 0.2528098333 | NA |
| MI | -0.3763694310 | NA |
| Ulcerative colitis | 0.5151009267 | NA |
| Down syndrome | 1.6635600313 | 1.6769979398 |
| Spondyloarthritis | 0.4423233965 | NA |
| Liver disease | -0.2469035534 | NA |
| Smoker (ever) | -0.2539046423 | -0.2458658190 |
| Opioid prescriptions  0 | Ref. | Ref. |
| 1-6 | -0.2647431393 | -0.2434069599 |
| > 7 | -0.0007416241 | 0.0502791263 |

**References:**

1. National Center for Injury Prevention and Control. CDC compilation of benzodiazepines, muscle relaxants, stimulants, zolpidem, and opioid analgesics with oral morphine milligram equivalent conversion factors, 2018 version. Atlanta, GA: Centers for Disease Control and Prevention; 2018. Available at https://www.cdc.gov/drugoverdose/resources/data.html
